# Supplementary material
Source: Copernicus journal article supplement (doi:10.5194/nhess-26-1859-2026)
Supplement: Supplementary file 1 [file nhess-26-1859-2026-supplement.pdf]

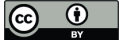

*Supplement of*

## **Pan-European assessment of coastal flood hazards**

**Camila Cotrim et al.**

*Correspondence to:* Alexandra Toimil (toimila@unican.es)

The copyright of individual parts of the supplement might differ from the article licence.

**Table S1 State-of-the-Art on existing large-scale coastal flooding studies centered on the estimation of flooding resulting from extreme events.**

| Study                      | Flooding resolution | Dynamic flood modeling | Wave contribution | Variable foreshore slope | Methodology validation |
|----------------------------|---------------------|------------------------|-------------------|--------------------------|------------------------|
| Present study              | 25 m                | x                      | Semi-empirical    | x                        | x                      |
| Wing et al. (2024)         | 30 m                | x                      | Empirical         |                          |                        |
| Le Gal et al. (2023)       | 100 m               | x                      | Empirical         |                          | x                      |
| Kirezci et al. (2020)      | 1 km                |                        | Semi-empirical    |                          |                        |
| Paprotny et al. (2018)     | 100 m               |                        |                   |                          | x                      |
| Vousdoukas et al. (2016)   | 90 m                | x                      | Empirical         |                          | x                      |
| Muis et al. (2016)         | 1 km                |                        |                   |                          |                        |
| Groenemeijer et al. (2016) | 100 m               |                        |                   |                          | x                      |

**Table S2 Description and correspondence of land use classes from ODSE-LULC (Witjes et al., 2022) and Global Land Cover dataset (Copernicus, 2019), accompanied by the respective Manning roughness coefficients, following van der Sande et al. (2003).**

| Group | Description                        | ODSE-LULC | Global Land Cover  | Manning roughness coefficient |
|-------|------------------------------------|-----------|--------------------|-------------------------------|
| 1     | Urban areas                        | 1         | 50                 | 0.150                         |
| 2     | Other urban areas                  | 2 – 8     | –                  | 0.200                         |
| 3     | Rural areas                        | 9 – 15    | 20 / 40            | 0.127                         |
| 4     | Natural vegetation                 | 16 – 21   | 111 – 126          | 0.100                         |
| 5     | Bare areas (beaches, sand), dunes) | 22 – 26   | 30 / 60 / 70 / 100 | 0.120                         |
| 6     | Waterbodies                        | 27 – 33   | 80 / 90 / 200      | 0.050                         |

**Table S3 Relative maximum flooded area (%) resulting from a 100-yr TWL under different flood modeling approaches (static vs dynamic), hydrograph shapes (triangular vs smooth-shaped) with a composite scenario and different types of storms, per country. Values are shown relative to each floodplain to facilitate the comparison of results.**

| Country                       | Static flood modeling | Dynamic flood modeling |                           |       |       |       |       |
|-------------------------------|-----------------------|------------------------|---------------------------|-------|-------|-------|-------|
|                               |                       | Triangular hydrograph  | Smooth-shaped hydrographs |       |       |       |       |
|                               |                       |                        | Composite scenario        | ST A  | ST B  | ST C  | ST D  |
| <b>Albania</b>                | 37.43                 | 28.42                  | 27.32                     | 13.79 | 0.00  | 26.31 | 27.30 |
| <b>Belgium</b>                | 33.51                 | 6.61                   | 7.83                      | 0.00  | 7.77  | 8.31  | 0.00  |
| <b>Bosnia and Herzegovina</b> | 5.5                   | 0                      | 0.00                      | 0.00  | 0.00  | 0.00  | 0.00  |
| <b>Croatia</b>                | 20.04                 | 14.98                  | 12.65                     | 0.00  | 0.00  | 11.90 | 12.91 |
| <b>Cyprus</b>                 | 7.19                  | 6.18                   | 5.63                      | 0.01  | 0.01  | 5.62  | 5.62  |
| <b>Denmark</b>                | 24.95                 | 22.8                   | 22.29                     | 4.26  | 0.12  | 18.13 | 22.17 |
| <b>Estonia</b>                | 4.83                  | 3.36                   | 3.34                      | 3.32  | 0.00  | 0.01  | 3.34  |
| <b>Finland</b>                | 19.07                 | 17.78                  | 17.71                     | 17.70 | 0.00  | 0.00  | 17.68 |
| <b>France</b>                 | 38.74                 | 12.35                  | 14.33                     | 0.22  | 11.60 | 2.33  | 2.73  |
| <b>Germany</b>                | 47.99                 | 35.23                  | 35.58                     | 0.29  | 24.62 | 35.67 | 6.63  |
| <b>Greece</b>                 | 14.09                 | 12.17                  | 11.89                     | 4.28  | 1.11  | 7.77  | 10.89 |
| <b>Ireland</b>                | 24.47                 | 14.49                  | 15.23                     | 0.00  | 15.19 | 14.54 | 0.06  |
| <b>Isle of Man</b>            | 10.48                 | 8.12                   | 8.59                      | 0.00  | 8.59  | 0.01  | 0.01  |
| <b>Italy</b>                  | 28.39                 | 22.34                  | 21.01                     | 1.57  | 0.00  | 20.28 | 21.56 |
| <b>Latvia</b>                 | 13.5                  | 6.26                   | 5.90                      | 5.90  | 0.00  | 0.00  | 5.91  |
| <b>Lithuania</b>              | 29.63                 | 25.68                  | 24.63                     | 24.76 | 0.00  | 0.01  | 24.66 |
| <b>Malta</b>                  | 22.19                 | 19.92                  | 19.91                     | 19.92 | 0.00  | 19.91 | 19.92 |
| <b>Montenegro</b>             | 44.83                 | 3.12                   | 3.08                      | 0.00  | 0.00  | 3.04  | 3.08  |
| <b>Netherlands</b>            | 69.93                 | 45.46                  | 46.23                     | 0.00  | 29.83 | 46.55 | 0.00  |
| <b>Norway</b>                 | 32.13                 | 27.76                  | 27.85                     | 0.84  | 17.18 | 25.83 | 6.72  |
| <b>Poland</b>                 | 45.58                 | 36.54                  | 34.97                     | 26.40 | 0.00  | 8.78  | 35.04 |
| <b>Portugal</b>               | 23.17                 | 12.13                  | 13.03                     | 0.03  | 13.03 | 1.95  | 0.03  |
| <b>Russia</b>                 | 27.28                 | 18.73                  | 17.31                     | 15.80 | 0.00  | 0.53  | 17.20 |
| <b>Slovenia</b>               | 32.23                 | 25.56                  | 25.59                     | 0.00  | 0.00  | 25.58 | 0.00  |
| <b>Spain</b>                  | 26.62                 | 10.15                  | 10.07                     | 5.88  | 3.85  | 3.88  | 6.20  |
| <b>Sweden</b>                 | 11.44                 | 8.91                   | 8.59                      | 7.68  | 0.00  | 1.49  | 8.59  |
| <b>Turkey</b>                 | 0.89                  | 0.76                   | 0.76                      | 0.02  | 0.03  | 0.77  | 0.76  |
| <b>United Kingdom</b>         | 43.66                 | 12.33                  | 14.10                     | 0.00  | 13.74 | 5.56  | 0.23  |

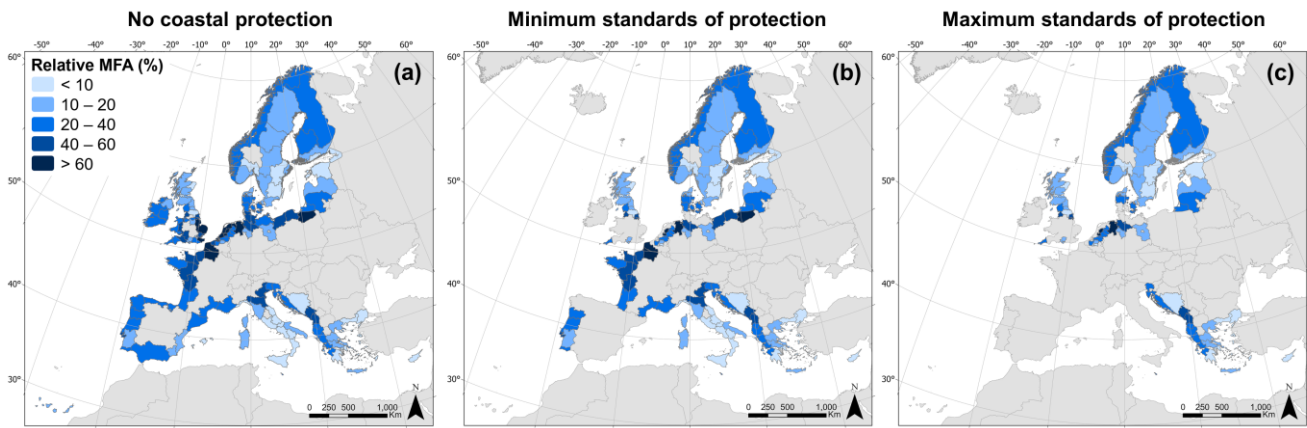

**Figure S1: European spatial distribution of 100-yr TWL flood hazards without coastal protection (a) and with minimum (b) and maximum (c) standards of coastal protection using a static flood model. Results are shown as relative MFA in regards to the floodplain area of each NUTS2. Standards of coastal protections were obtained from the COASTPRO-EU database (van Maanen et al., 2025).**

## References

- Copernicus: Global Dynamic Land Cover. Available at: <https://land.copernicus.eu/en/products/global-dynamic-land-cover>, 2019. Last accessed: 22/04/2026.
- Le Gal, M., Fernández-Montblanc, T., Duo, E., Montes Perez, J., Cabrita, P., Souto Ceccon, P., Gastal, V., Ciavola, P., and Armaroli, C.: A new European coastal flood database for low-medium intensity events, *Nat. Hazards Earth Syst. Sci.*, 23, 3585–3602, <https://doi.org/10.5194/nhess-23-3585-2023>, 2023.
- Groenemeijer, P., Vajda, A., Lehtonen, I., Kämäräinen, M., Venäläinen, A., Gregow, H., Becker, N., Nissen, K., Ulbrich, U., and Paprotny, D.: Present and future probability of meteorological and hydrological hazards in Europe, *ESSL*, 165 pp., 2016. Available at: <https://resolver.tudelft.nl/uuid:906c812d-bb49-408a-aecd-f1a900ad8725>. Last accessed: 23/04/2026.
- Kirezci, E., Young, I. R., Ranasinghe, R., Muis, S., Nicholls, R. J., Lincke, D., and Hinkel, J.: Projections of global-scale extreme sea levels and resulting episodic coastal flooding over the 21st Century, *Sci. Rep.*, 10, 1–12, <https://doi.org/10.1038/s41598-020-67736-6>, 2020.
- Maanen, N. Van, Plaen, J. J. G. De, Tiggeloven, T., Colmenares, M. L., and Ward, P. J.: Brief communication : Bridging the data gap – a call to enhance the representation of global coastal flood protection, 2075–2080. *Nat. Hazards Earth Syst. Sci.*, doi: 10.5194/nhess-25-2075-2025, 2025.
- Muis, S., Verlaan, M., Winsemius, H. C., Aerts, J. C. J. H., and Ward, P. J.: A global reanalysis of storm surges and extreme sea levels, *Nat. Commun.*, 7, <https://doi.org/10.1038/ncomms11969>, 2016.
- Paprotny, D., Morales-Nápoles, O., Vousdoukas, M. I., Jonkman, S. N., and Nikulin, G.: Accuracy of pan-European coastal flood mapping, *J. Flood Risk Manag.*, 12, 1–16, <https://doi.org/10.1111/jfr3.12459>, 2018.
- van der Sande, C. J., de Jong, S. M., and de Roo, A. P. J.: A segmentation and classification approach of IKONOS-2 imagery for land cover mapping to assist flood risk and flood damage assessment, *Int. J. Appl. Earth Obs. Geoinf.*, 4, 217–229, [https://doi.org/10.1016/S0303-2434\(03\)00003-5](https://doi.org/10.1016/S0303-2434(03)00003-5), 2003.
- Vousdoukas, M. I., Voukouvalas, E., Mentaschi, L., Dottori, F., Giardino, A., Bouziotas, D., Bianchi, A., Salamon, P., and Feyen, L.: Developments in large-scale coastal flood hazard mapping, *Nat. Hazards Earth Syst. Sci.*, 16, 1841–1853, <https://doi.org/10.5194/nhess-16-1841-2016>, 2016.
- Wing, O. E. J., Bates, P. D., Quinn, N. D., Savage, J. T. S., Uhe, P. F., Cooper, A., Collings, T. P., Addor, N., Lord, N. S., Hatchard, S., Hoch, J. M., Bates, J., Probyn, I., Himsworth, S., Rodríguez González, J., Brine, M. P., Wilkinson, H., Sampson, C. C., Smith, A. M., Neal, J. C., and Haigh, I. D.: A 30 m Global Flood Inundation Model for Any Climate Scenario, *Water Resour. Res.*, 60, <https://doi.org/10.1029/2023WR036460>, 2024.
- Witjes, M., Parente, L., van Diemen, C. J., Hengl, T., Landa, M., Brodský, L., Halounova, L., Križan, J., Antonić, L., Ilie, C. M., Craciunescu, V., Kilibarda, M., Antonijević, O., and Glušica, L.: A spatiotemporal ensemble machine learning framework for generating land use/land cover time-series maps for Europe (2000-2019) based on LUCAS, CORINE and GLAD Landsat, *PeerJ*, 10, <https://doi.org/10.7717/peerj.13573>, 2022.
